# Supplementary material for: The dental phenotype of hairless dogs with FOXI3 haploinsufficiency
Source: PubMed Central journal article supplement (PMC5511229; doi:10.1038/s41598-017-05764-5), 2017-07-14
Supplement: 41598_2017_5764_MOESM1_ESM.pdf [file 41598_2017_5764_MOESM1_ESM.pdf]

## Supplementary information

### The dental phenotype of hairless dogs with FOXI3 haploinsufficiency

Kornelius Kupczik<sup>1,2\*</sup>, Alexander Cagan<sup>3,4</sup>, Silke Brauer<sup>1</sup>, Martin S. Fischer<sup>2</sup>

<sup>1</sup> Max Planck Weizmann Center for Integrative Archaeology and Anthropology, Max Planck Institute for Evolutionary Anthropology, Deutscher Platz 6, 04103 Leipzig, Germany.

<sup>2</sup> Institut für Spezielle Zoologie und Evolutionsbiologie mit Phyletischem Museum, Friedrich-Schiller-Universität, Erbertstrasse 1, 07743 Jena, Germany.

<sup>3</sup> Department of Evolutionary Genetics, Max Planck Institute for Evolutionary Anthropology, Deutscher Platz 6, 04103 Leipzig, Germany.

<sup>4</sup> Wellcome Trust Sanger Institute, Hinxton, Cambridge CB10 1SA, UK.

\*Corresponding author: [kornelius\\_kupczik@eva.mpg.de](mailto:kornelius_kupczik@eva.mpg.de)

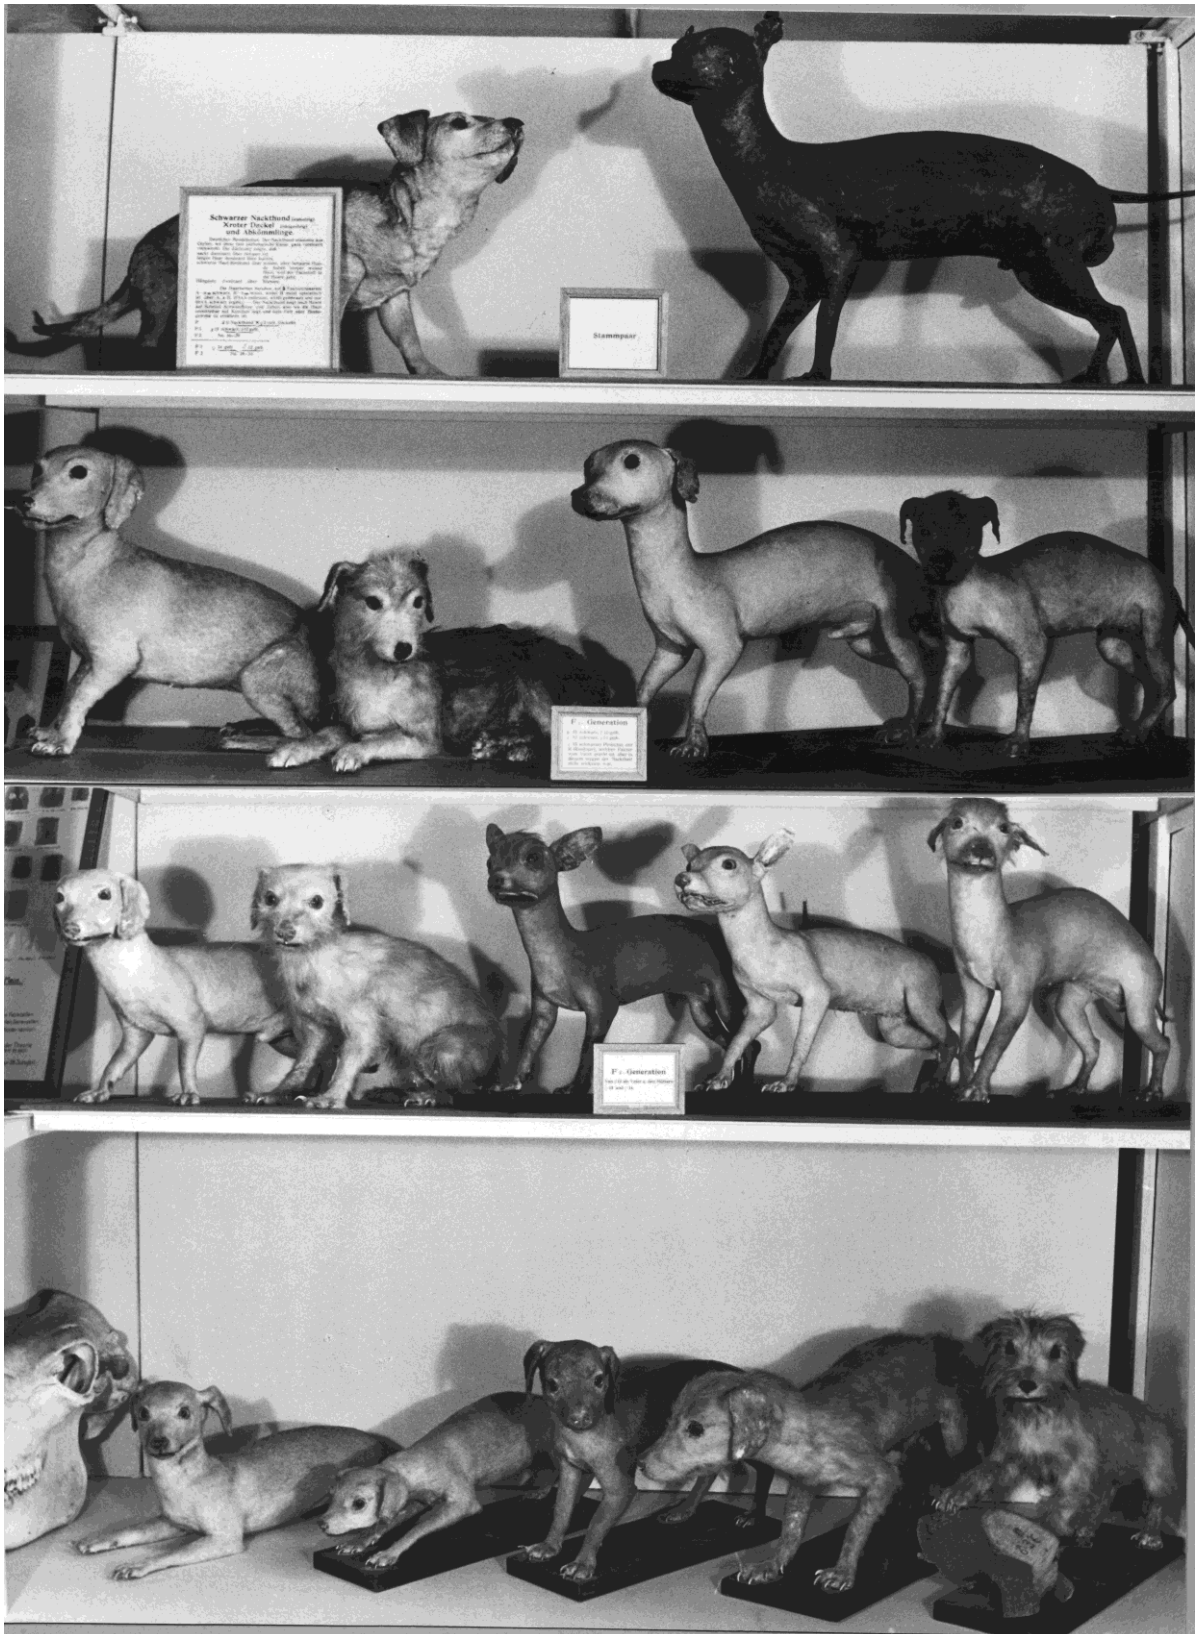

**Supplementary Fig. S1:** Historical photo of the museum's show case with taxidermy specimens of the hairless dog experiment. The founding generation with a female coated dog (left) and a male hairless dog (right) is on the top. The F1 and F2 generations are second and third from top, respectively (Archive of Phyletisches Museum, Jena).

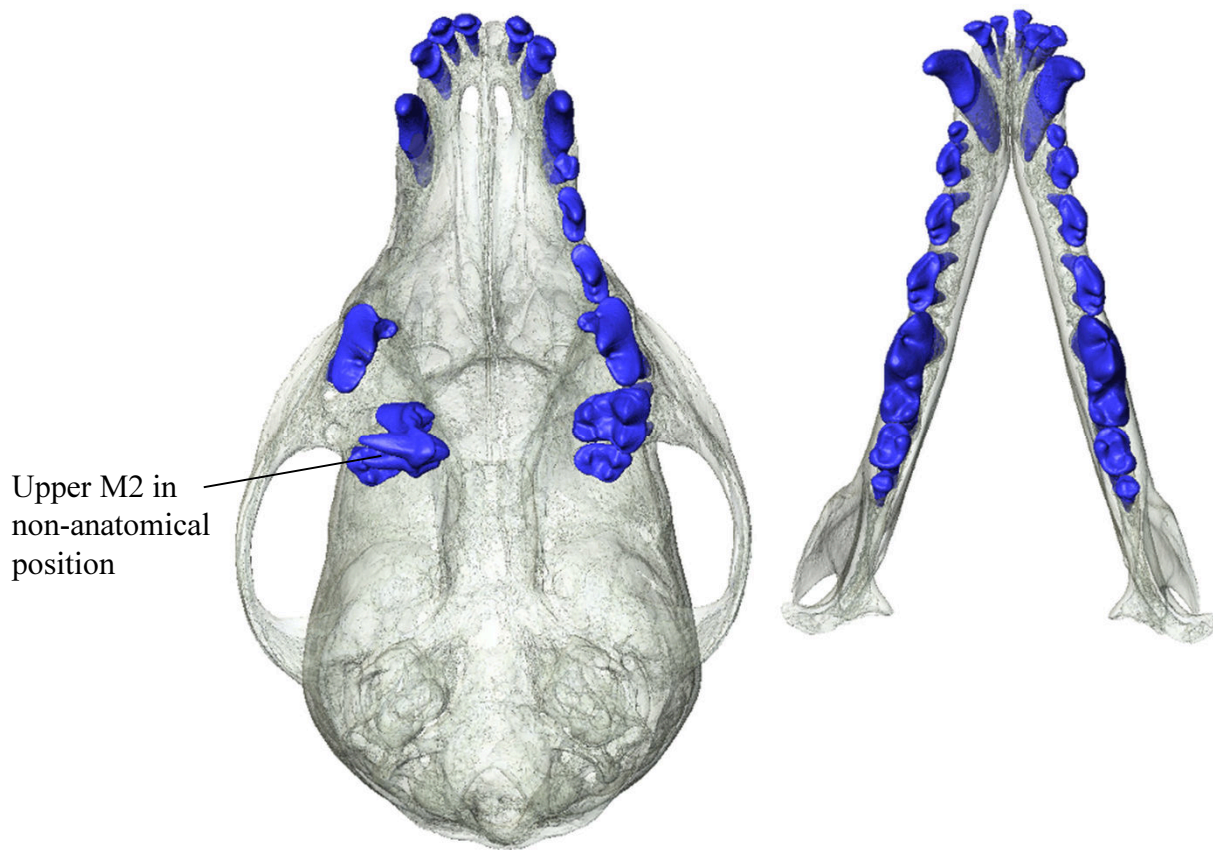

Occlusal view

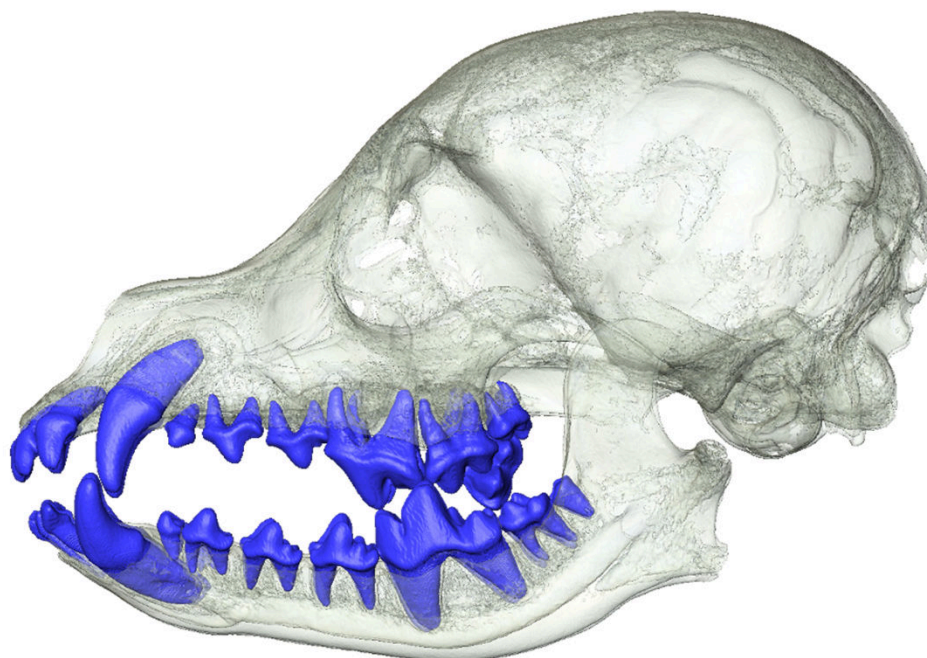

Lateral view

**Supplementary Figure S2.** Skull MAM1491, coated, complete permanent dentition

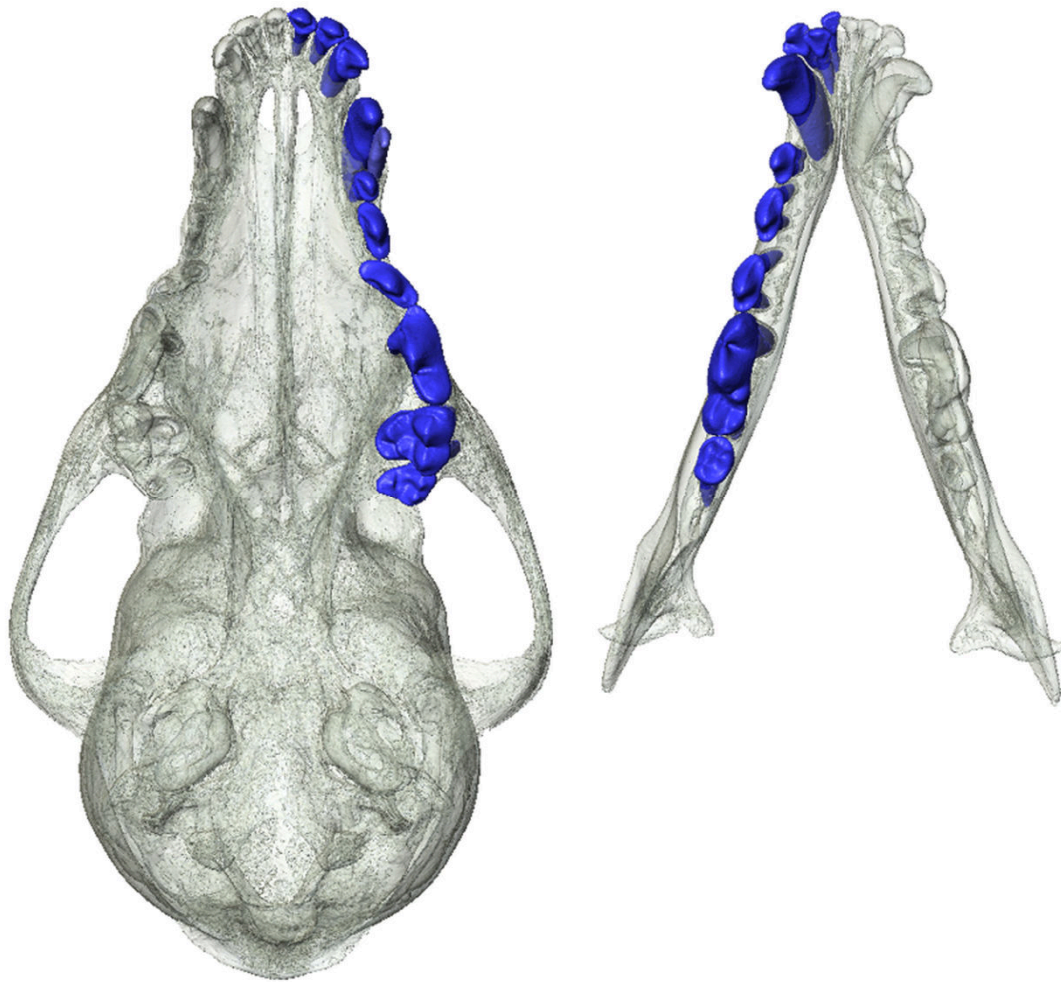

Occlusal view

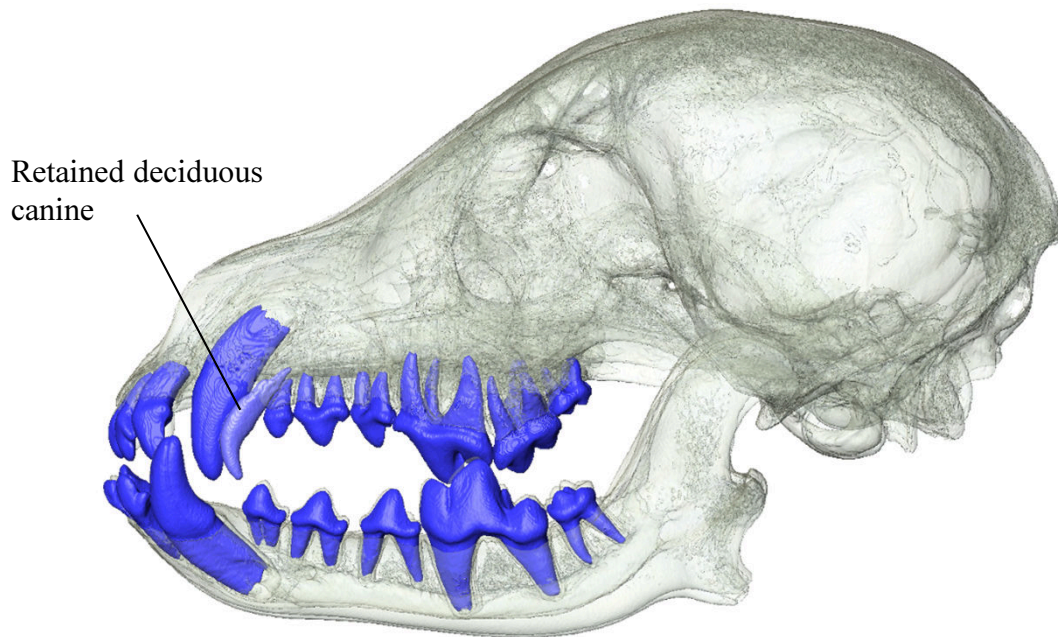

Lateral view

**Supplementary Figure S3.** Skull MAM1492, coated, complete permanent dentition

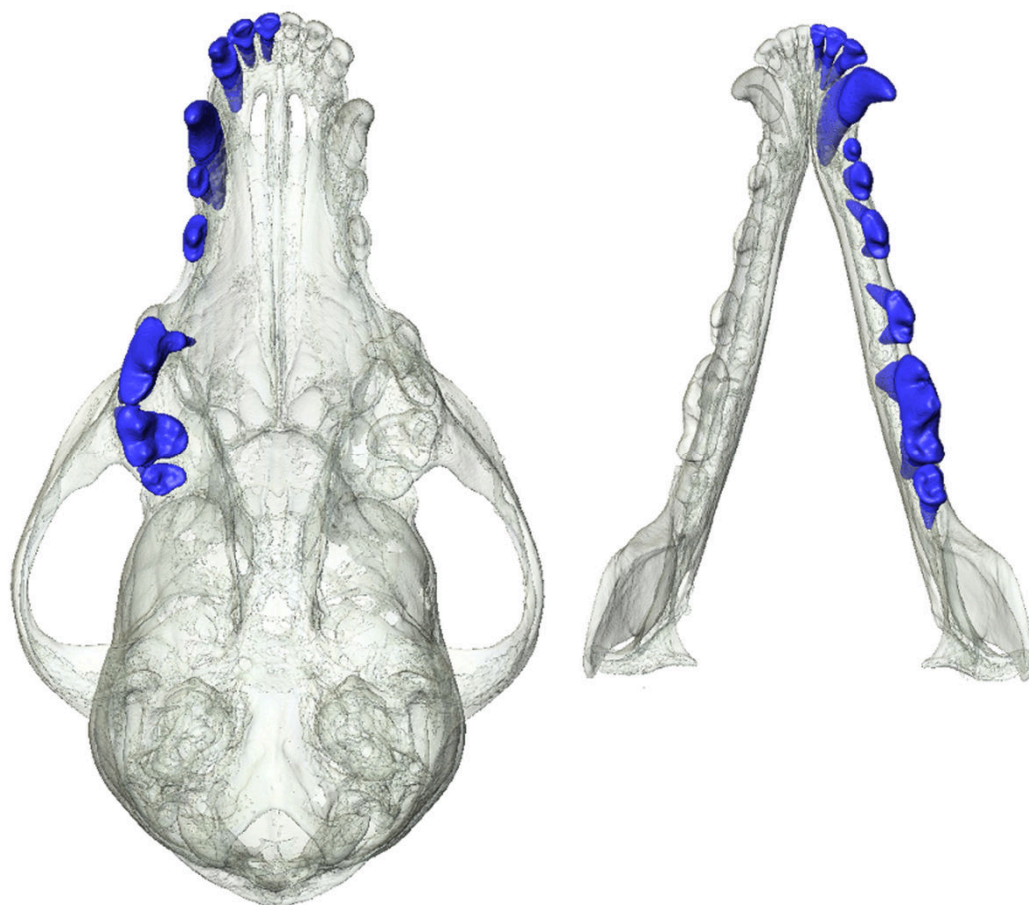

Occlusal view

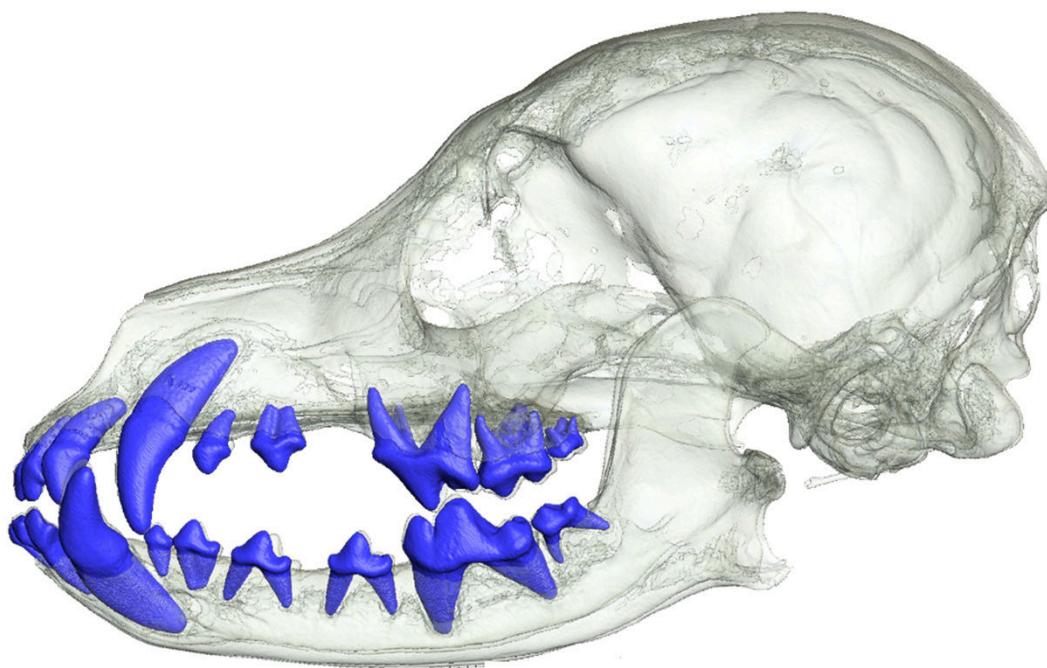

Lateral view

**Supplementary Figure S4.** Skull MAM1499, coated, complete permanent dentition

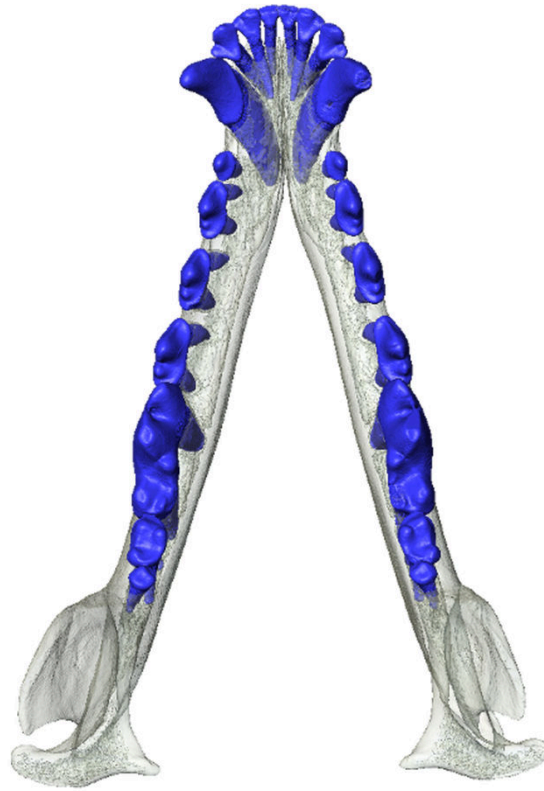

Occlusal view

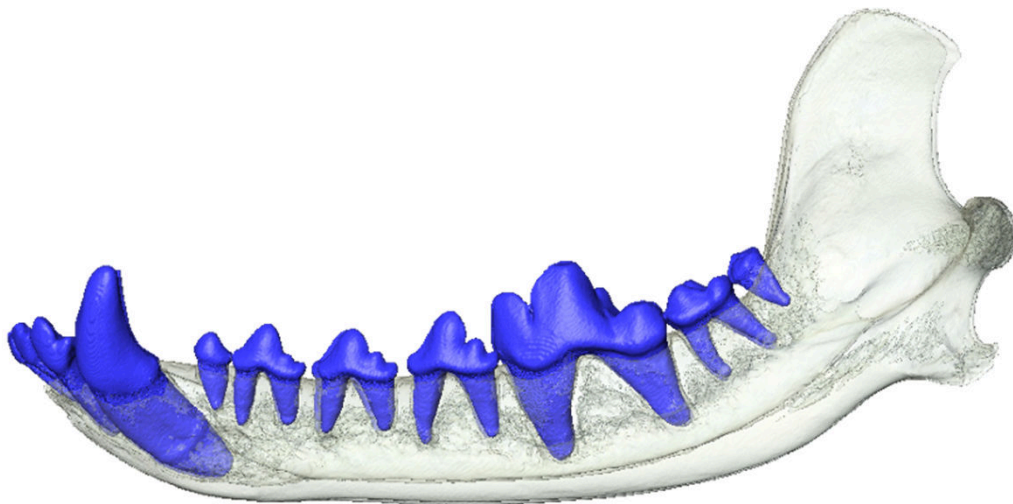

Lateral view

**Supplementary Figure S5.** Mandible MAM1501, coated, complete permanent dentition

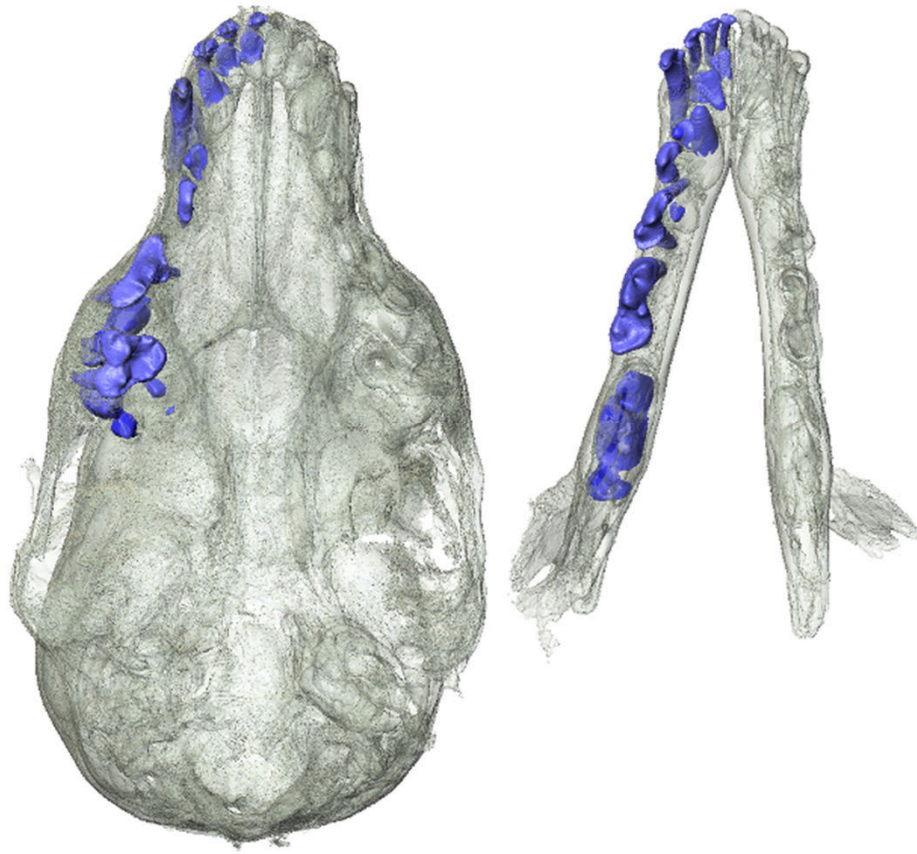

Occlusal view

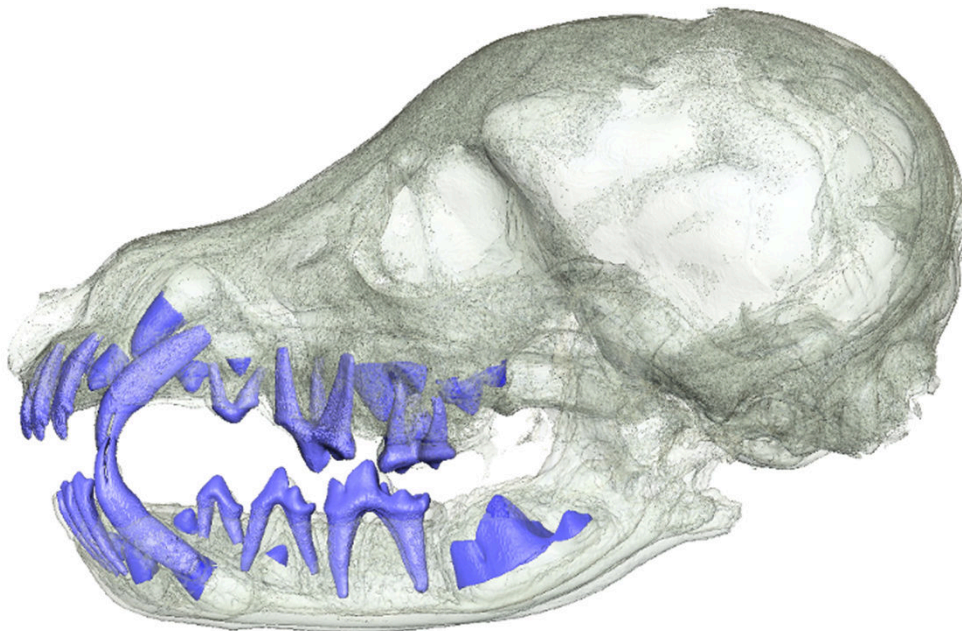

Lateral view

**Supplementary Figure S6.** Skull MAM1493, juvenile, coated, mixed dentition

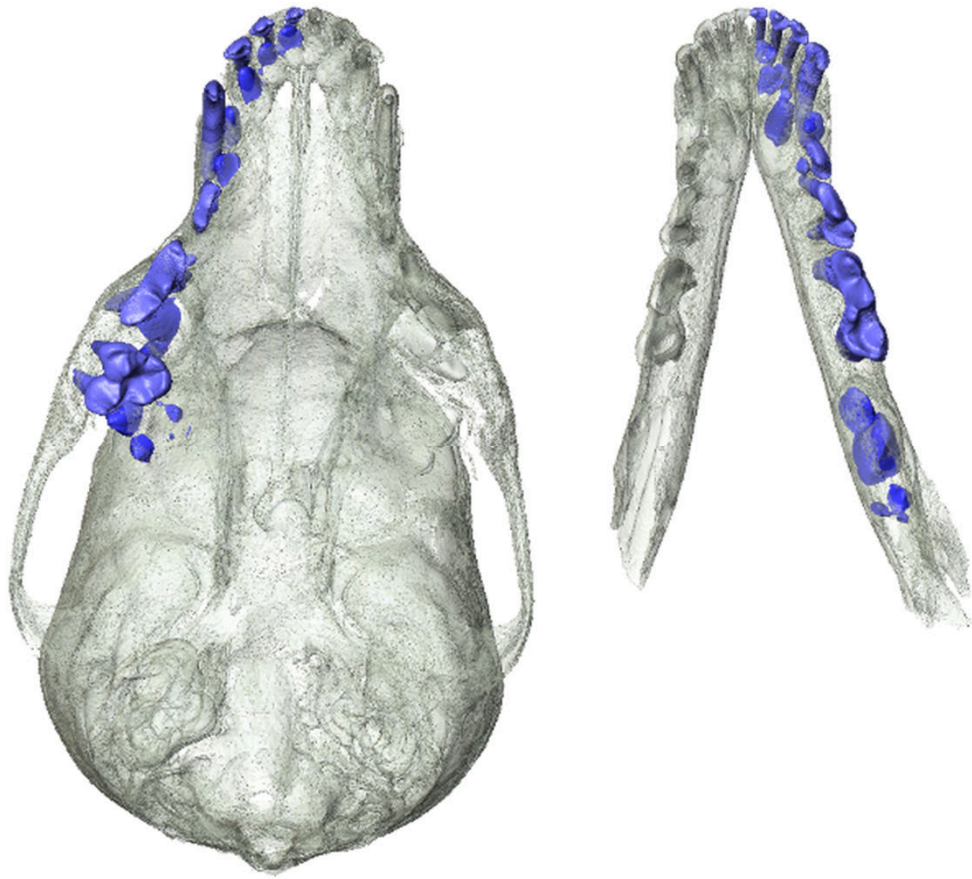

Occlusal view

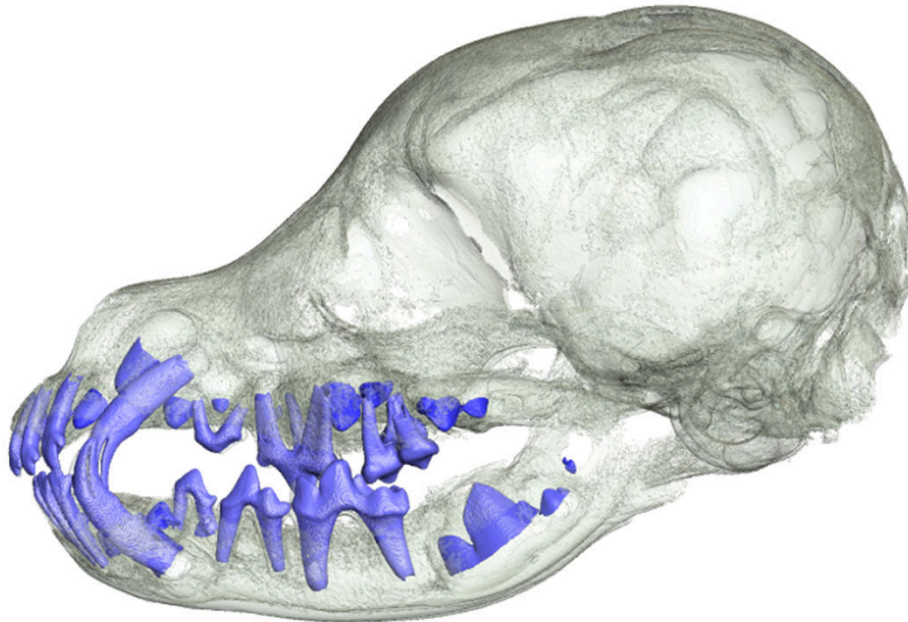

Lateral view

**Supplementary Figure S7.** Skull MAM1495, juvenile, coated, mixed dentition



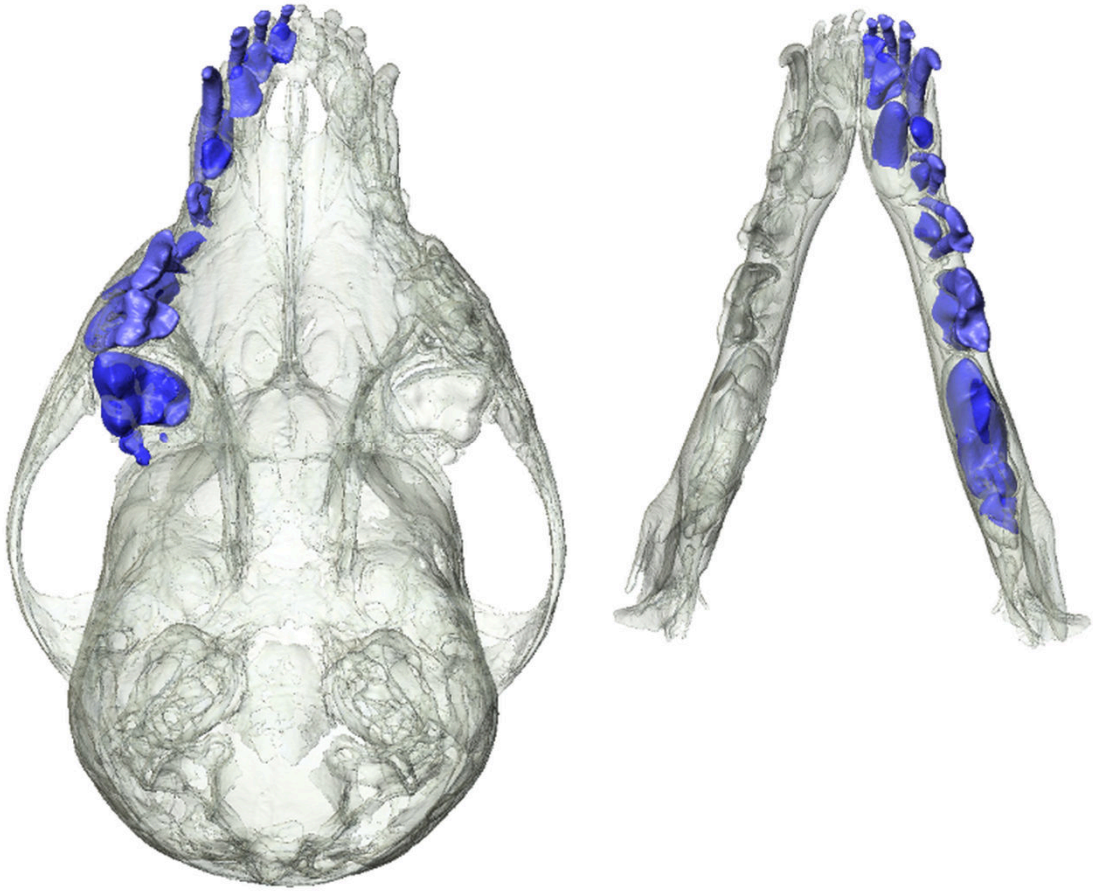

Occlusal view

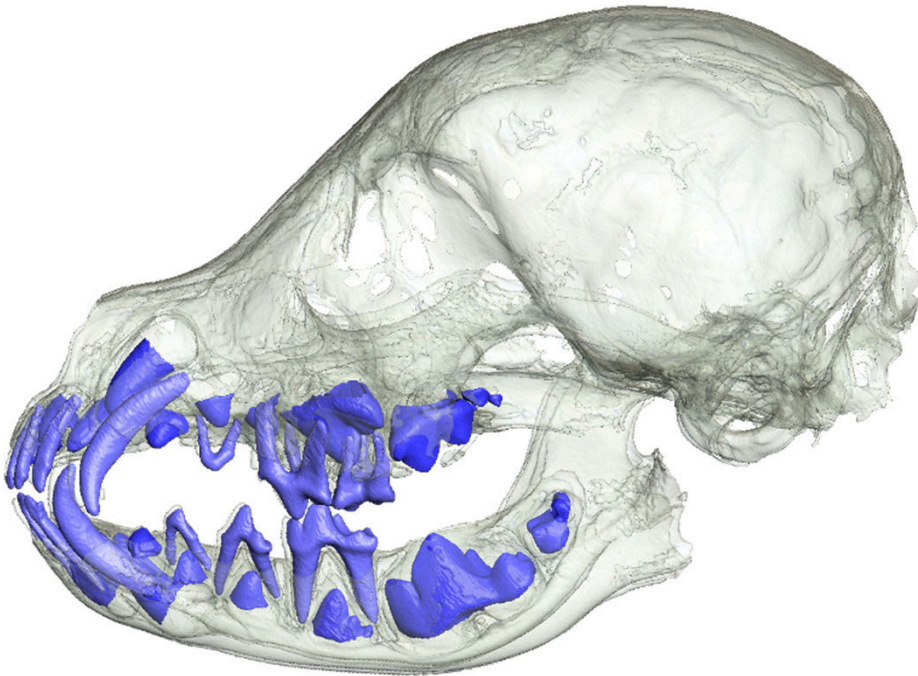

Lateral view

**Supplementary Figure S8.** Skull MAM1500, juvenile, coated, mixed dentition

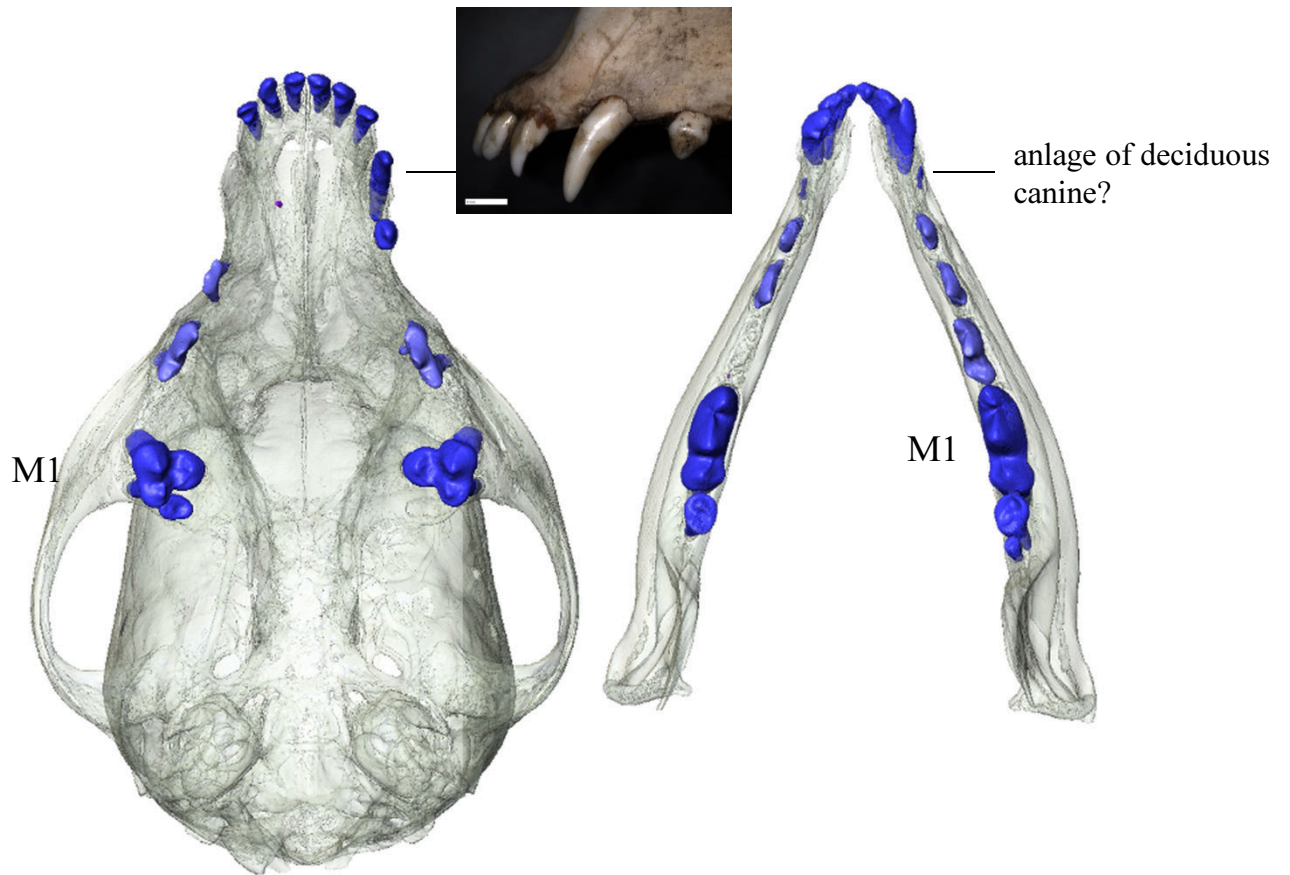

Occlusal view

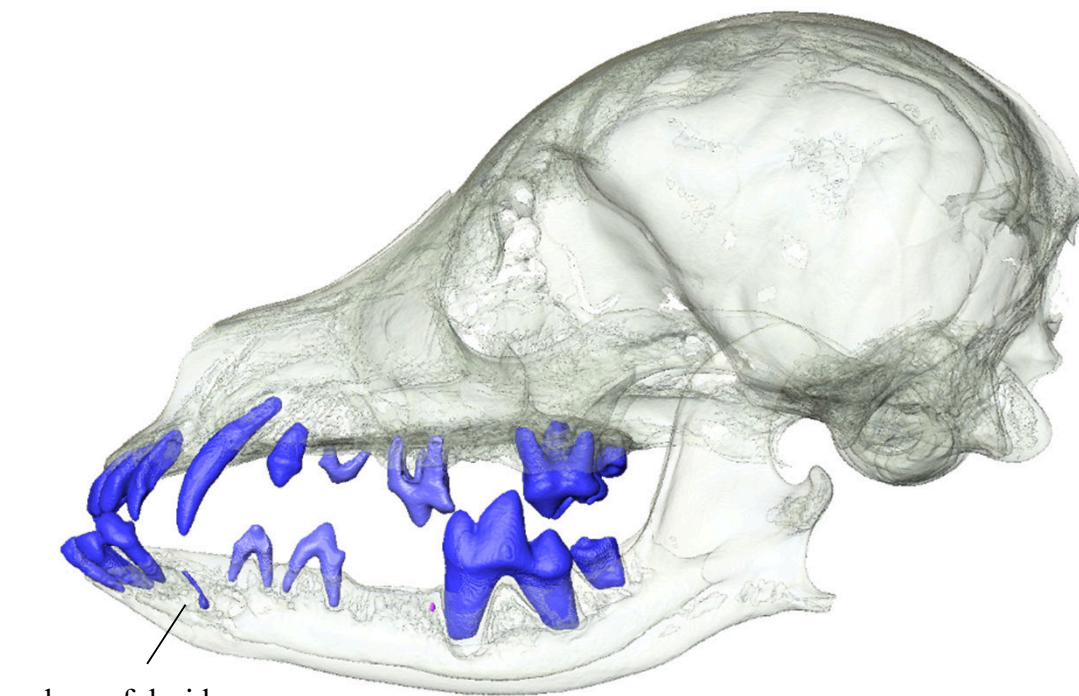

Lateral view

**Supplementary Figure S9.** Skull MAM1488, adult, hairless, agenesi of permanent premolars and canines

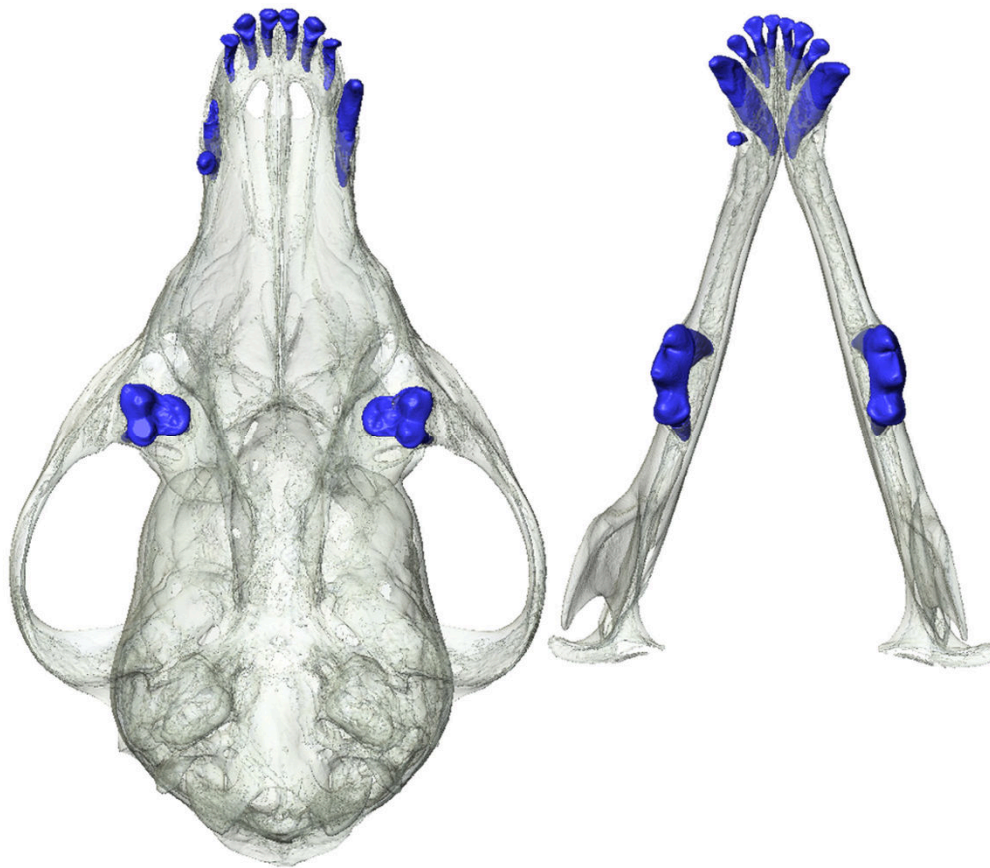

Occlusal view

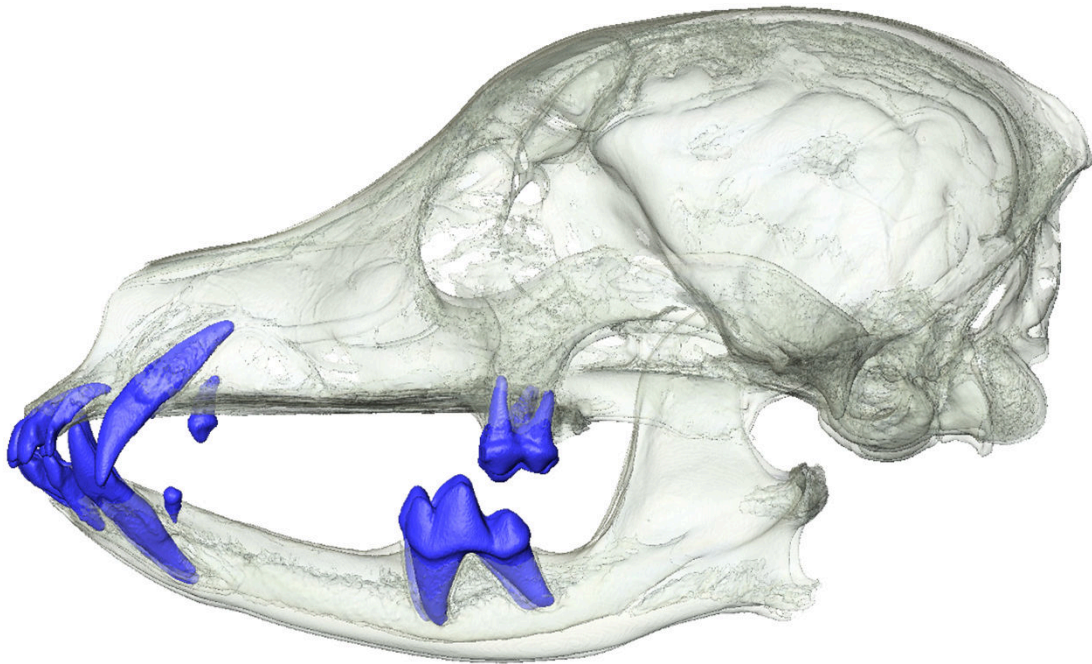

Lateral view

**Supplementary Figure S10.** Skull MAM1490, adult, hairless, agenesi of permanent premolars and canines

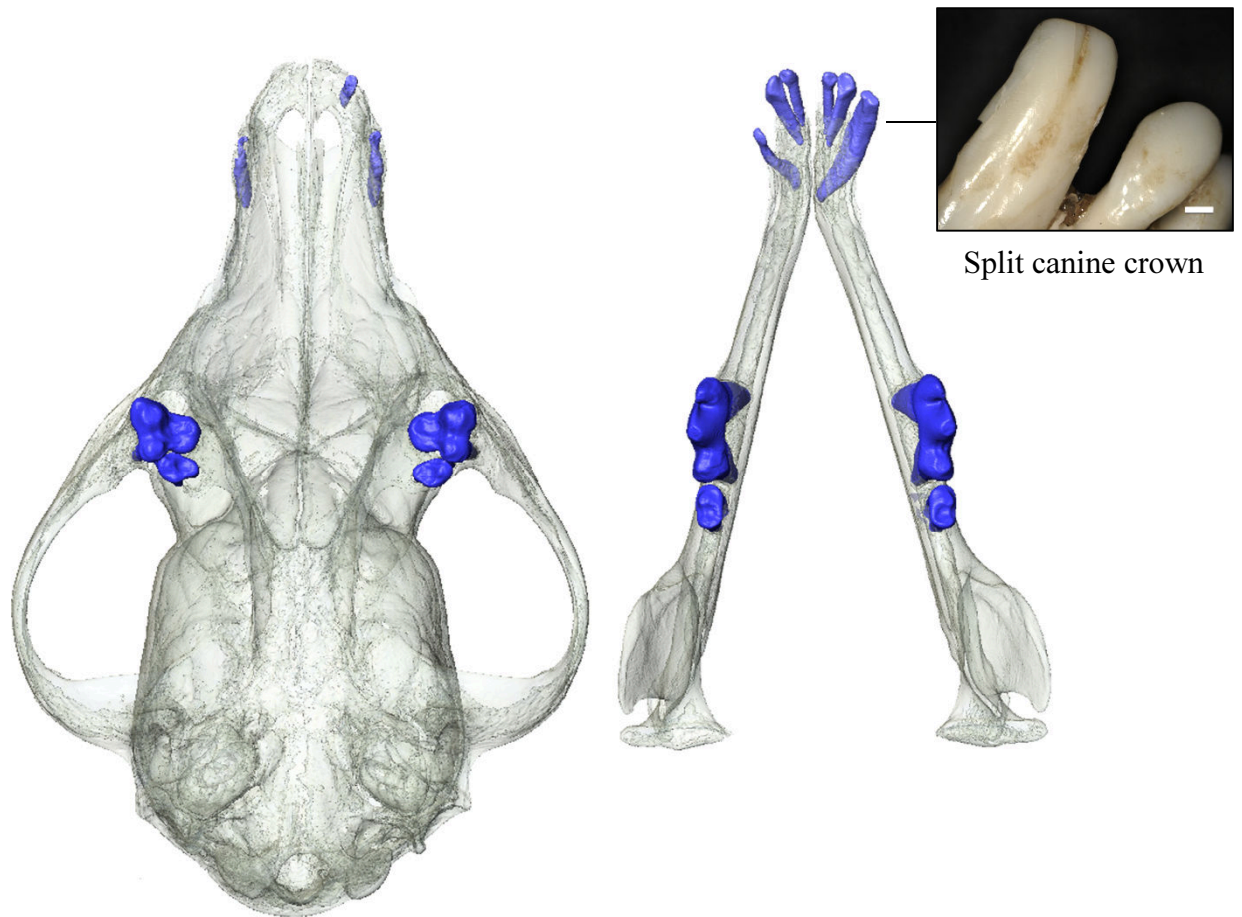

Occlusal view

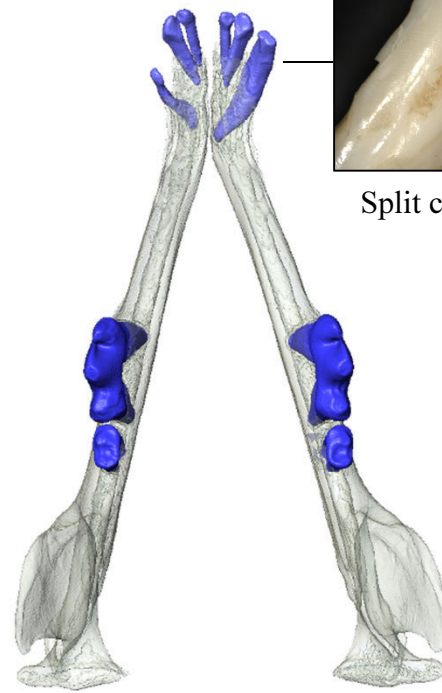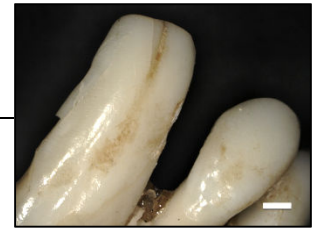

Split canine crown

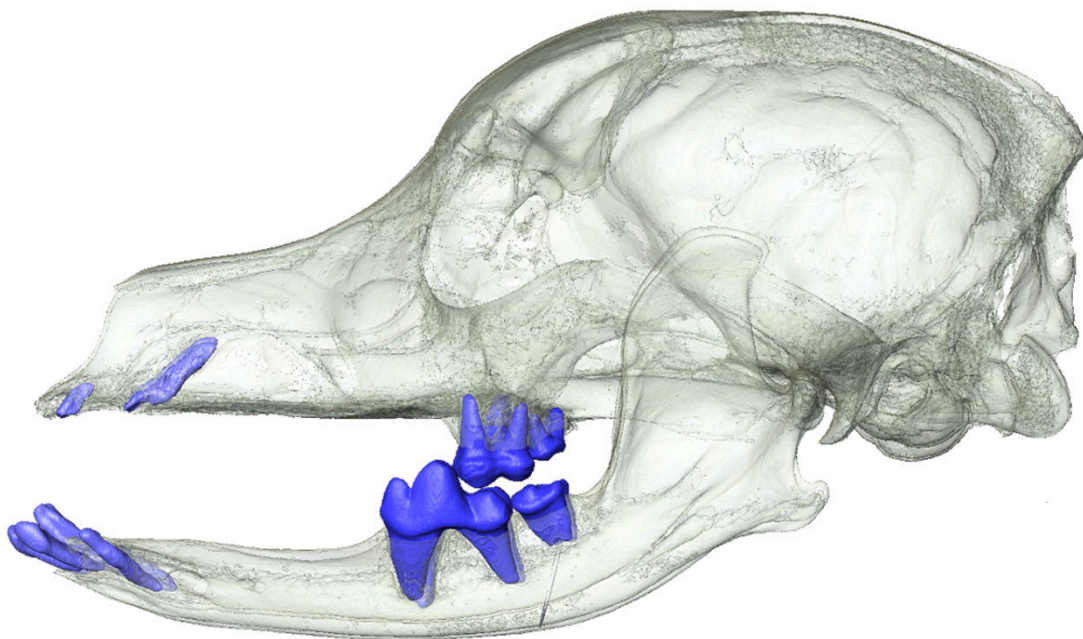

Lateral view

**Supplementary Figure S11.** Skull MAM1494, adult, hairless, agenesis of permanent incisors, premolars and canines

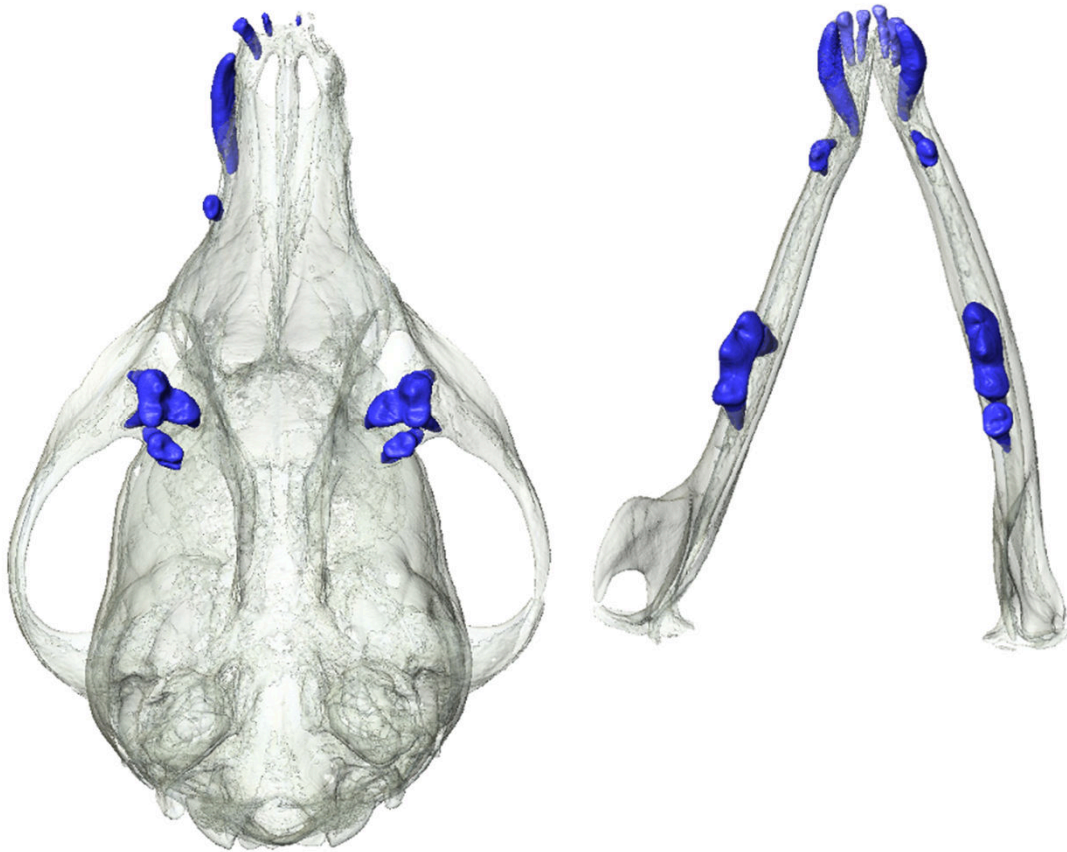

Occlusal view

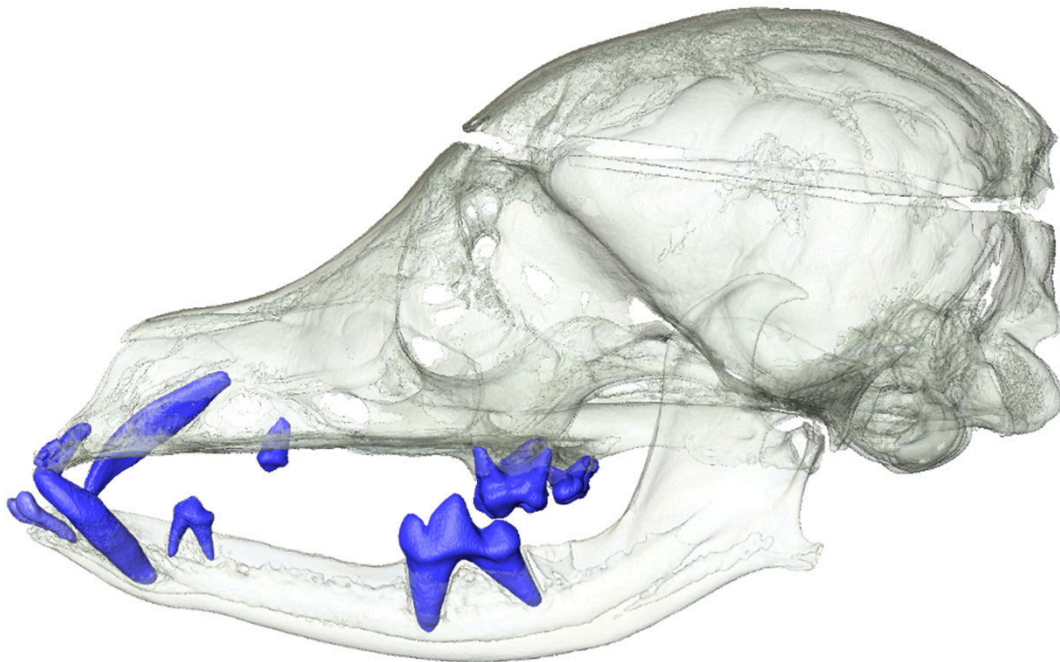

Lateral view

**Supplementary Figure S12.** Skull MAM1496, adult, hairless, agenesi of permanent incisors, premolars and canines

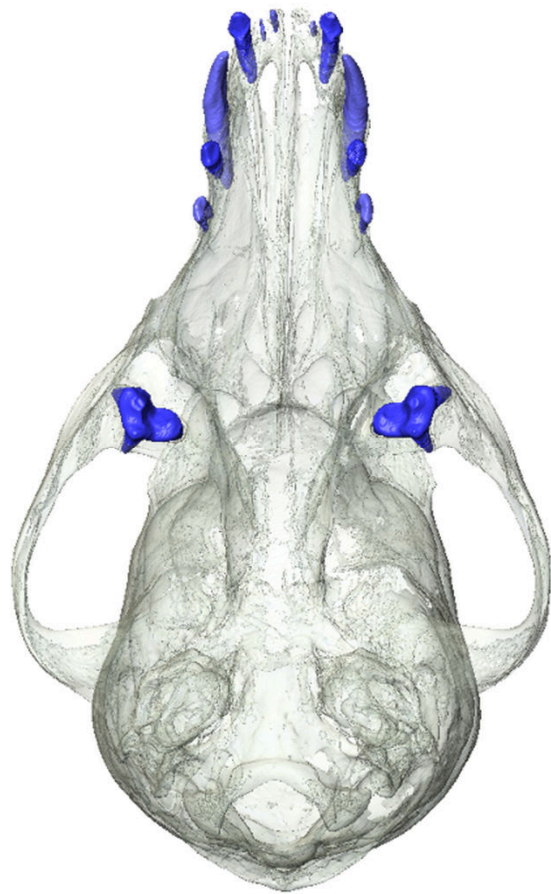

Occlusal view

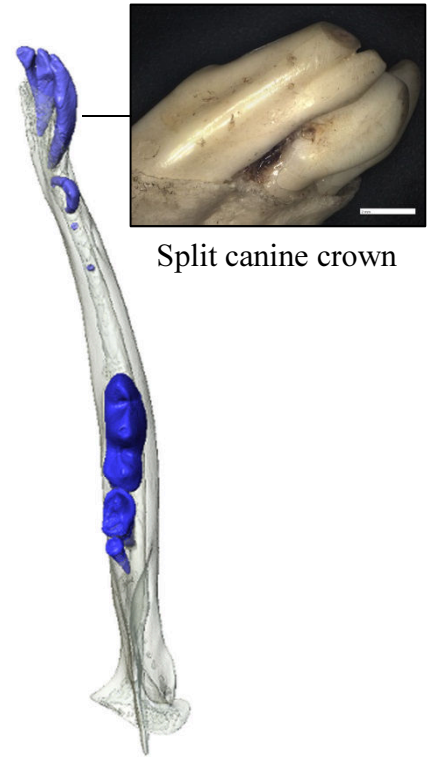

Split canine crown

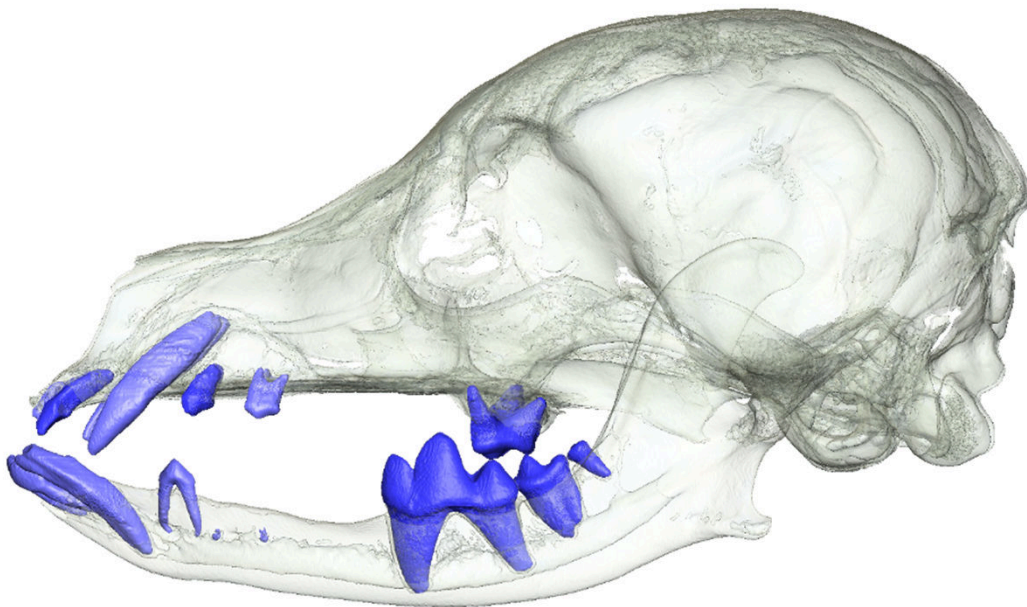

Lateral view

**Supplementary Figure S13.** Skull MAM1497, adult, hairless, agenesi of permanent incisors, premolars and canines.

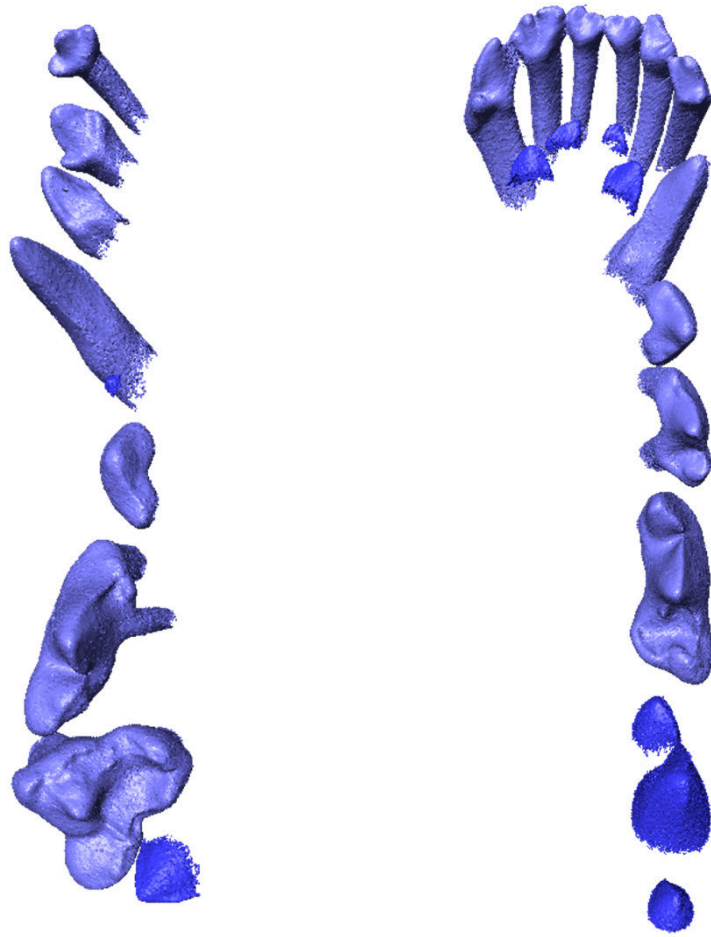

Occlusal view

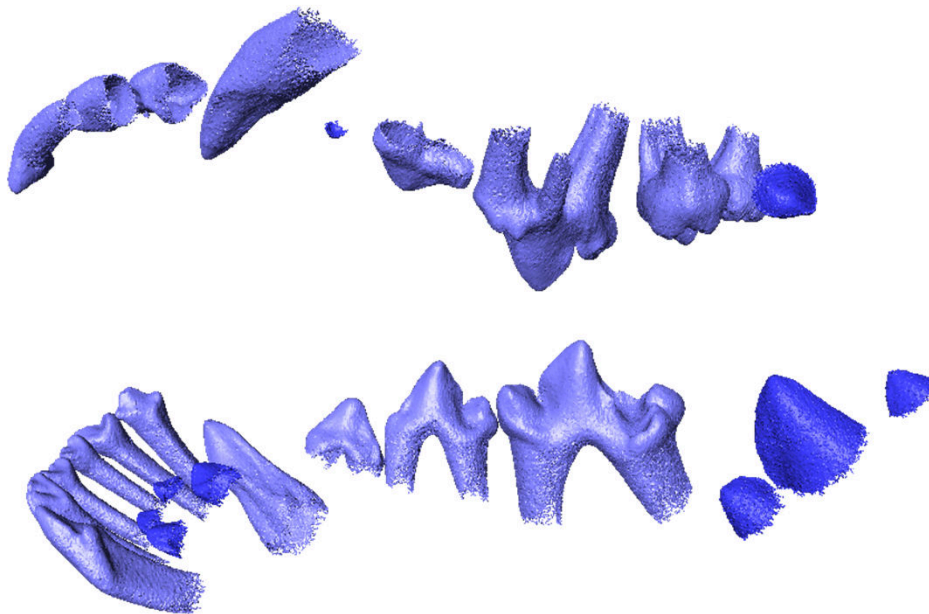

Lingual view

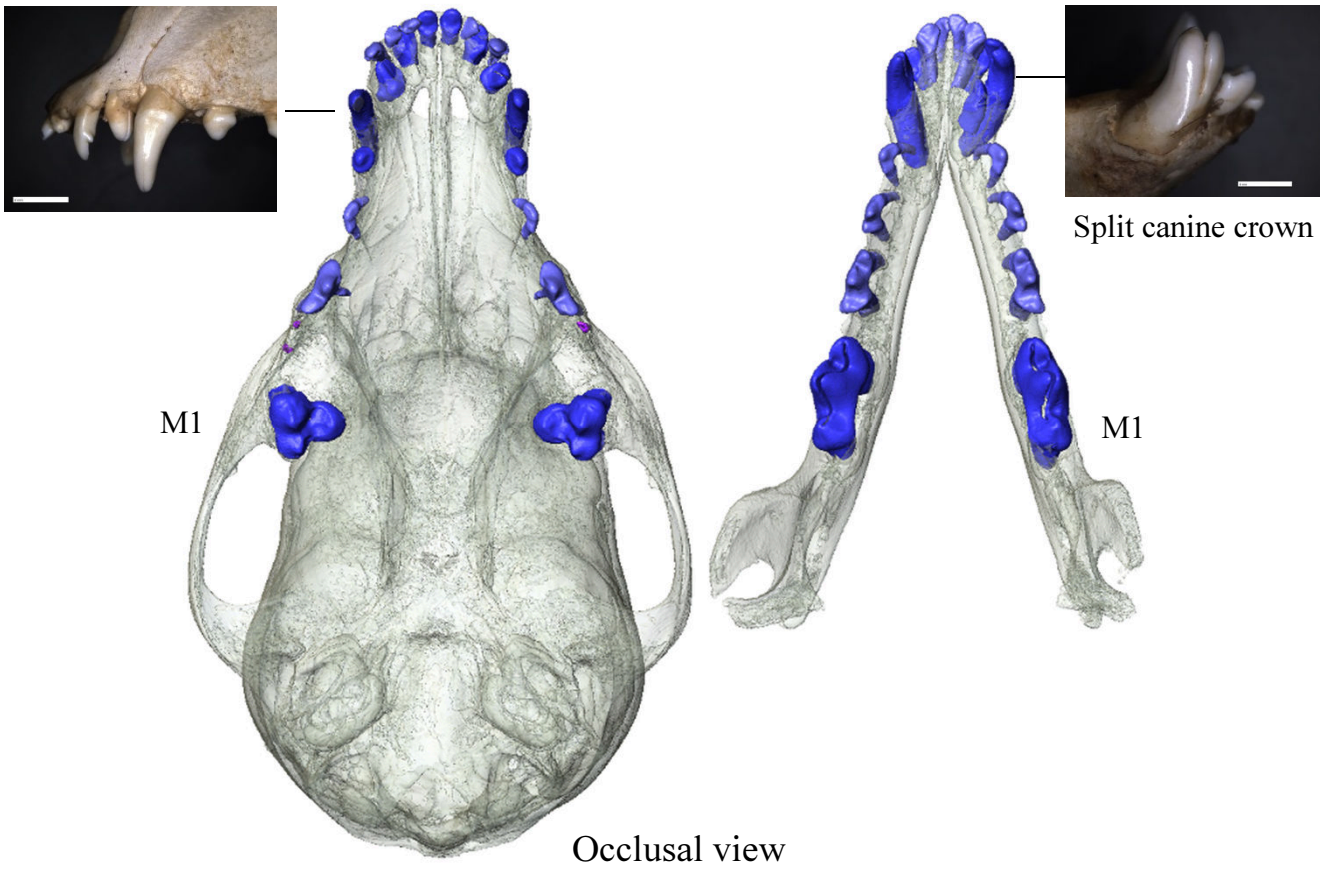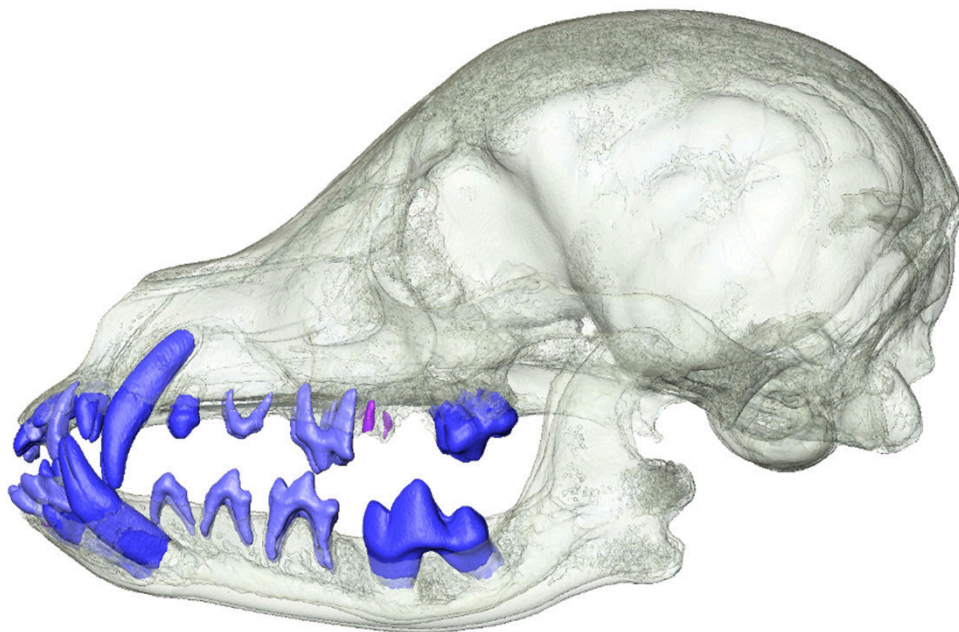

Lingual view

**Supplementary Figure S15.** Skull MAM1489, juvenile, patchy hair coat, permanent dentition erupted and roots in development



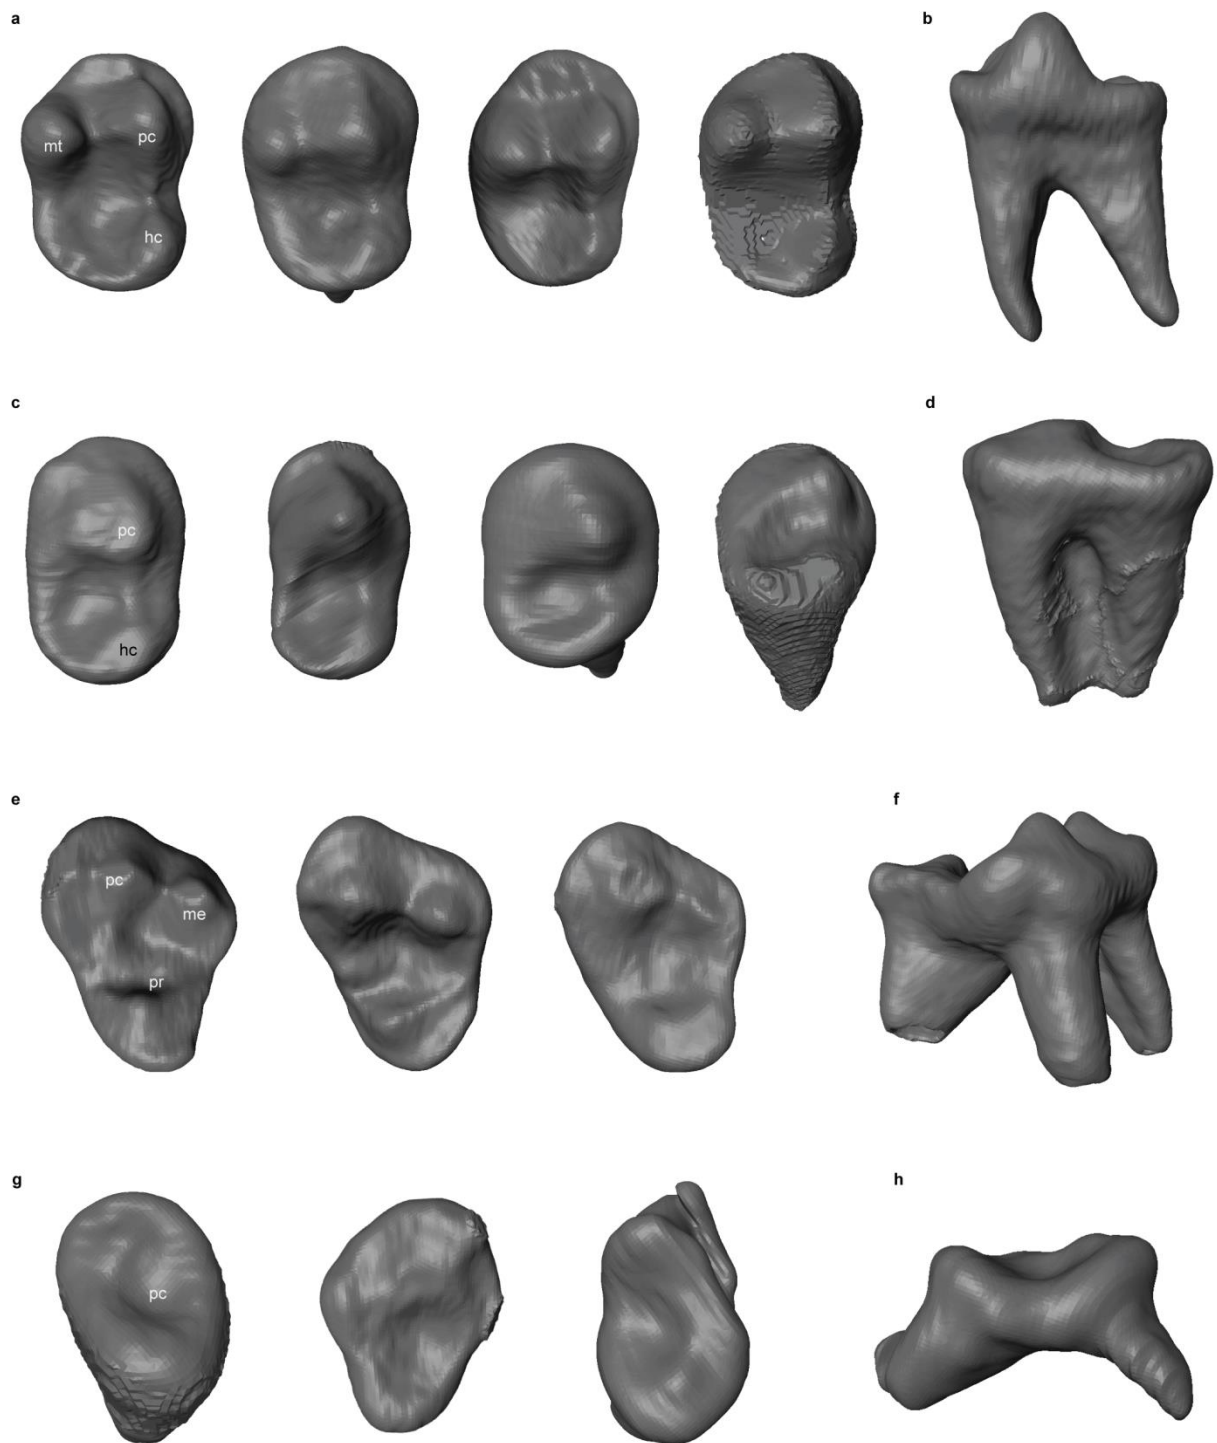

**Supplementary Fig. S16: Cusp and root morphology in lower and upper second molars ( $M_2$  and  $M^2$ , respectively) in coated and hairless dog sample.** a, Occlusal view of  $M_2$  in *FOXI3* *+/+* dogs (hc=hypoconid, mt=metaconid, pc=protoconid). b, lateral view of double-rooted  $M_2$  in *FOXI3* *+/+* dog. c, Occlusal view of  $M_2$  in *FOXI3* *+/-* dog with loss of metaconid and reduced hypoconid. d, Lateral view of  $M_2$  with fused roots in *FOXI3* *+/-* dog. e, Occlusal view of  $M^2$  in *FOXI3* *+/+* dogs (me=metacone, pc=paracone, pr=protocone). f, lateral view of three-rooted  $M^2$  in *FOXI3* *+/+* dog. g, Occlusal view of  $M^2$  in *FOXI3* *+/-* dogs with loss of metacone and protocone. h, lateral view of two-rooted  $M^2$  in *FOXI3* *+/-* dog.

**Supplementary Table S1.** Mandibular and maxillary first molar metrics in mm

| Accession number | Coat     | M <sub>1</sub> md* length | M <sub>1</sub> bl* width | side  | M <sup>1</sup> md length | M <sup>1</sup> bl width | side  |
|------------------|----------|---------------------------|--------------------------|-------|--------------------------|-------------------------|-------|
| 1493             | Coated   | 15.38                     | 5.52                     | left  | -                        | -                       | -     |
| 1495             | Coated   | 14.52                     | 4.87                     | left  | -                        | -                       | -     |
| 1500             | Coated   | 16.55                     | 6.19                     | right | 10.29                    | 12.66                   | right |
| 1491             | Coated   | 15.74                     | 5.76                     | left  | 9.91                     | 12.25                   | left  |
| 1492             | Coated   | 16.99                     | 6.14                     | left  | 10.22                    | 12.27                   | left  |
| 1499             | Coated   | 15.13                     | 5.55                     | right | 8.8                      | 9.24                    | right |
| 1501             | Coated   | 18.11                     | 6.4                      | left  | -                        | -                       | -     |
| 1488             | Hairless | 13.75                     | 5.15                     | right | 8.41                     | 9.6                     | right |
| 1490             | Hairless | 16.27                     | 6.23                     | left  | 10.28                    | 12.17                   | left  |
| 1494             | Hairless | 16.71                     | 6.02                     | left  | 9.94                     | 11.58                   | left  |
| 1496             | Hairless | 13.1                      | 4.82                     | left  | 7.61                     | 9.48                    | left  |
| 1497             | Hairless | 15.46                     | 5.24                     | right | 6.92                     | 9.6                     | right |
| 1489             | Patchy   | 15.19                     | 6.1                      | left  | 9.29                     | 9.57                    | left  |

\*md= mesiodistal, bl=buccolingual

**Table S2.** Relative talonid height of M1

|               | Trigonid height (mm) | Talonid height (mm) | Rel. talonid height |
|---------------|----------------------|---------------------|---------------------|
| Coated dogs   |                      |                     |                     |
| MAM1493       | 7.72                 | 3.82                | 0.49                |
| MAM1495       | 6.23                 | 2.16                | 0.35                |
| MAM1500       | 9.65                 | 5.16                | 0.53                |
| MAM1491       | 8.51                 | 4.13                | 0.49                |
| MAM1492       | 9.01                 | 4.97                | 0.55                |
| MAM1499       | 6.67                 | 3.14                | 0.47                |
| MAM1501       | 9.38                 | 4.26                | 0.45                |
| Hairless dogs |                      |                     |                     |
| MAM2419       | 5.98                 | 2.13                | 0.36                |
| MAM1488       | 7.81                 | 3.64                | 0.47                |
| MAM1490       | 9.19                 | 5.19                | 0.56                |
| MAM1494       | 8.07                 | 3.48                | 0.43                |
| MAM1496       | 6.39                 | 3.59                | 0.56                |
| MAM1497       | 7.92                 | 4.51                | 0.57                |
| MAM1489*      | 8.33                 | 4.53                | 0.54                |

Relative talonid height is calculated as the ratio of protoconid cusp height (trigonid) and the hypoconid cusp height (talonid). \* patchy hair coat
